# Supplementary material
Source: Springer Nature journal article supplement (https://www.springermedizin.de/resource/supplementary/12958_2012_1012_MOESM1_ESM.pdf/9566602)

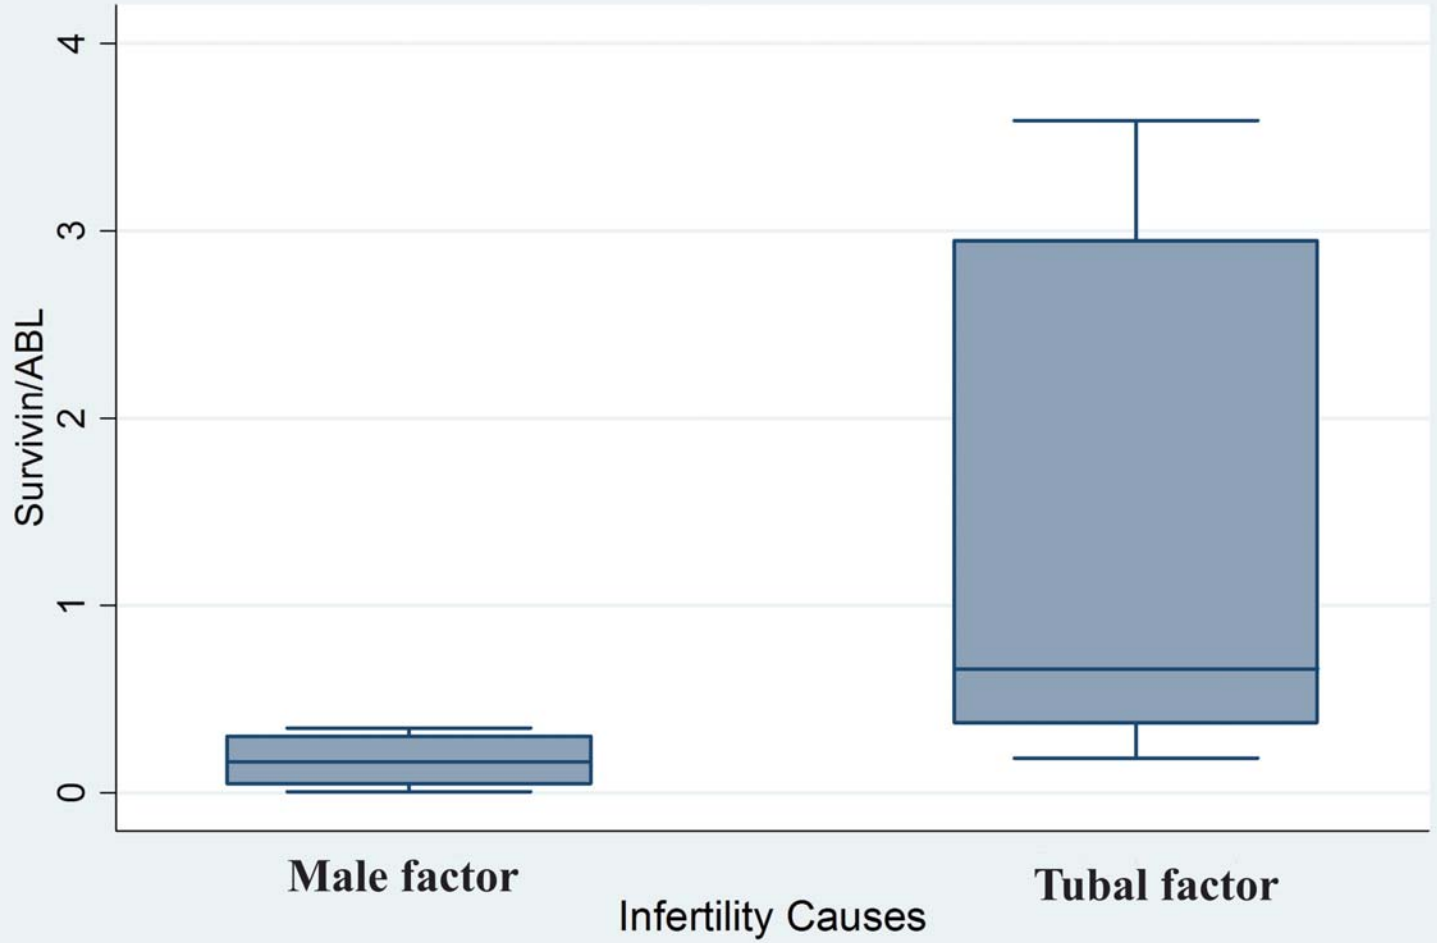

P-value\*: 0.007  
\*Wilcoxon rank-sum test

Supplement: MOESM1 [file 9566602]
